# Supplementary material for: Dopaminergic neuron injury in Parkinson’s disease is mitigated by interfering lncRNA SNHG14 expression to regulate the miR-133b/ α-synuclein pathway
Source: Aging (Albany NY). 2019 Nov 4;11(21):9264–79. doi: 10.18632/aging.102330 (PMC6874444; doi:10.18632/aging.102330)
Supplement: Supplementary Figure 1 [file aging-11-102330-s001.pdf]

## SUPPLEMENTARY FIGURE

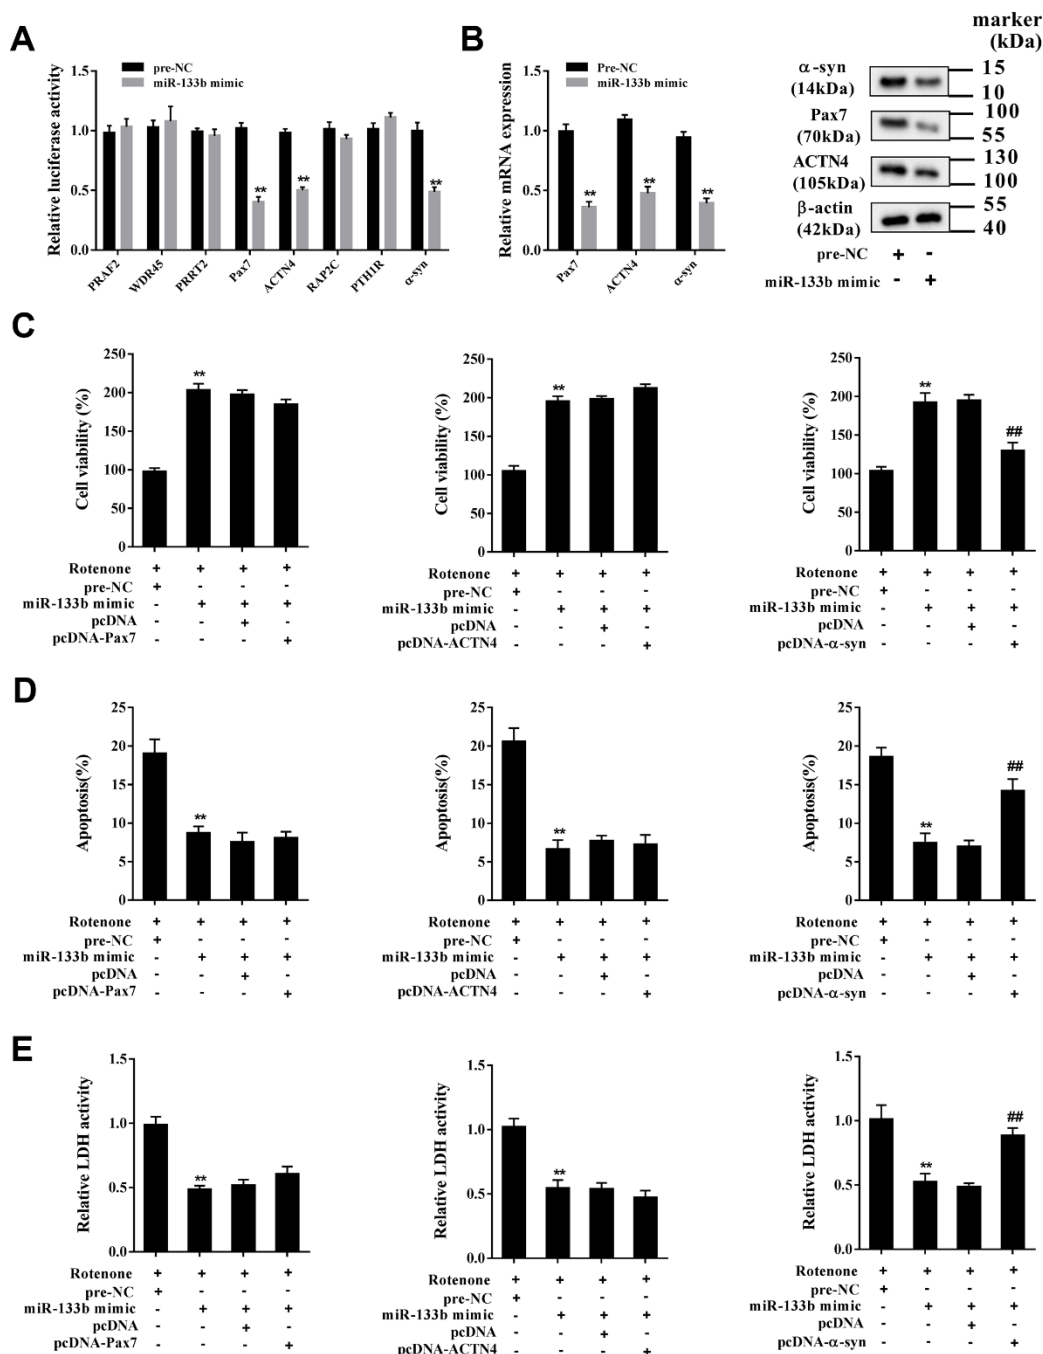

**Supplementary Figure 1.** (A) The 3'UTR activity of several target genes of miR-133b was measured using dual luciferase reporter gene assay. (B) The expression levels of Pax7, ACTN4 and α-syn were measured using qRT-PCR and western blotting. Pax7, ACTN4 and α-syn was overexpressed respectively in MN9D cells, which had been transfected with miR-133b mimic. (C) Cell viability, (D) percentage of apoptosis, (E) LDH activity of each group was measured after rotenone treatment (1μmol/L). \*\*P<0.01 compared with pre-NC, ##P<0.01 compared with pcDNA.
